# Supplementary material for: Preparation and characterization of novel PMMA bone cement containing 3,4-dichloro-5-hydroxyfuran-2(5H)-one
Source: Royal Society of Chemistry journal article supplement (doi:10.1039/d4ra06607c), 2025-01-01
Supplement: d4ra06607c1.pdf [file d4ra06607c1.pdf]

## **Preparation and characterization of a novel PMMA bone cement containing 3,4-dichloro-5-hydroxyfuran-2(5H)-one**

Wen-Han Bu<sup>a,b,†</sup>, Ayakuzi Asilebieke<sup>d,†</sup>, Lu-Yang Han<sup>a,b,†</sup>, Yang Xu<sup>c,d,\*</sup>, Tao Zhou<sup>c,\*</sup>, and Jian-Jun Chu<sup>a,b,d\*</sup>

<sup>†</sup> Wen-Han Bu, Ayakuzi Asilebieke, and Lu-Yang Han contributed equally to this work

<sup>a</sup>Department of Orthopedics, The Second People's Hospital of Hefei, Hefei Hospital, Affiliated to Anhui Medical University, No. 246 of Heping Road, Yaohai District, Hefei, Anhui 230011, China

<sup>b</sup>The Fifth Clinical Medical School of Anhui Medical University, Hefei, Anhui 230032, China

<sup>c</sup>Department of Orthopedics, The People's Hospital of Ma'anshan, Ma'anshan, Anhui 243000, China

<sup>d</sup>School of Food and Biological Engineering, Hefei University of Technology, Hefei, Anhui 230009, China

\*Correspondence: Jian-Jun Chu: [chujianj@mail.ustc.edu.cn](mailto:chujianj@mail.ustc.edu.cn); Tao Zhou: [zty7621@163.com](mailto:zty7621@163.com); Yang Xu: [xuyang@hfut.edu.cn](mailto:xuyang@hfut.edu.cn)

**1. Leaching tests of PMMA cement, 10 % DHF-MAA cement and ALBC (containing 1.25 % Gentamycin Sulfate).**

TABLE S1: Formulation of ALBC (percentage by mass of each component).

| Formulation | Powder(%) |      |      |                    | Liquid(%) |      |
|-------------|-----------|------|------|--------------------|-----------|------|
|             | PMMA      | ZrO2 | BPO  | Gentamycin Sulfate | MMA       | DMPT |
| ALBC        | 53.07     | 9.51 | 0.45 | 0.77               | 35.43     | 0.77 |

**2. Leaching tests of PMMA cement, 10 % DHF-MAA cement and ALBC (containing 1.25 % Gentamycin Sulfate).**

TABLE S2: Colony Counts for NS group, PMMA cement group, 10 % DHF-MAA cement group, and ALBC (containing 1.25 % Gentamycin Sulfate) group (\* indicates a significant difference compared to the NS group).

| Group               | Colony count |
|---------------------|--------------|
| NS                  | 294.2 ± 20.9 |
| PMMA cement         | 254.8 ± 32.6 |
| 10 % DHF-MAA cement | 263.2 ± 43.0 |
| ALBC                | 3.8 ± 3.2 *  |

**3. Setting time of cement**

TABLE S3: Maximum temperature and setting time of cements.(\* indicates a significant difference compared to the PMMA cement group, ^ indicates a significant difference compared to the 2.5 % DHF-MAA cement cement group)

| Group                | Maximum temperature (°C) | Setting time (min) |
|----------------------|--------------------------|--------------------|
| PMMA cement          | 48.4 ± 0.9               | 14.6 ± 0.4         |
| 2.5 % DHF-MAA cement | 48.1 ± 0.5               | 14.5 ± 0.3         |
| 5 % DHF-MAA cement   | 43.8 ± 0.4               | 15.4 ± 0.2         |
| 7.5 % DHF-MAA cement | 40.0 ± 0.8               | 17.3 ± 0.1         |
| 10 % DHF-MAA cement  | 38.0 ± 0.5 *             | 18.3 ± 0.1 ^       |
